# Supplementary material for: Daytime Napping and Nighttime Sleep Duration with Incident Diabetes Mellitus: A Cohort Study in Chinese Older Adults
Source: MDPI journal article supplement (doi:10.3390/ijerph18095012), 2021-05-09
Supplement: s1 [file s1]

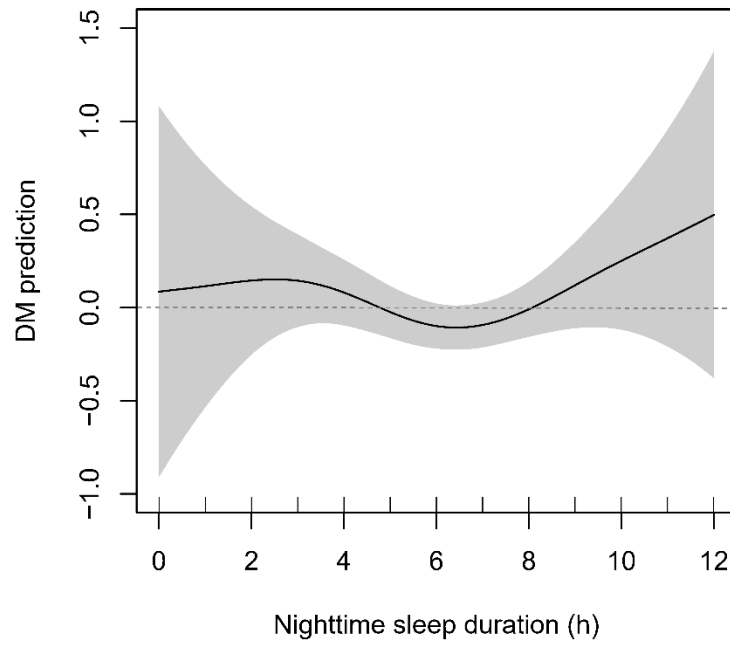

**Supplementary Figure S1. Plots of estimated smoothing spline function of nighttime sleep duration with 95% confidence band for the generalized additive model when the response variable was DM.**
