# Supplementary material for: Daytime Napping and Nighttime Sleep Duration with Incident Diabetes Mellitus: A Cohort Study in Chinese Older Adults
Source: MDPI journal article supplement (doi:10.3390/ijerph18095012), 2021-05-09
Supplement: s1 [file s1]

**Supplementary Table S2. Associations of independent variables and DM measured by the multivariable generalized additive model**

|                                | Outcome: DM               |        |
|--------------------------------|---------------------------|--------|
|                                | $\beta$                   | $p$    |
| Age                            | 0.006                     | 0.617  |
| Gender                         |                           |        |
| Male                           | Ref                       |        |
| Female                         | 0.420                     | 0.020* |
| Education                      |                           |        |
| Illiterate/no formal education | Ref                       |        |
| Primary school                 | 0.179                     | 0.229  |
| Middle school or above         | 0.074                     | 0.697  |
| Race                           |                           |        |
| Han ethnicity                  | Ref                       |        |
| Other minorities               | -0.046                    | 0.865  |
| Area of residence              |                           |        |
| Rural                          | Ref                       |        |
| Urban                          | 0.211                     | 0.110  |
| Current marriage status        |                           |        |
| Not married                    | Ref                       |        |
| Married or cohabitated         | -0.186                    | 0.257  |
| Ever smoker                    | 0.060                     | 0.717  |
| Ever drinker                   | 0.019                     | 0.894  |
| SBP                            | 0.004                     | 0.164  |
| Daytime napping                | 0.003                     | 0.010* |
| Nighttime sleep duration       | Smooth Curve, EDF = 1.951 | 0.605  |

Adjusted for age, gender, race, education level, area of residence, marital status, drinking and smoking status and systolic BP. \* $P < 0.05$ .
